# Supplementary material for: Spatial confinement growth of perovskite nanocrystals for ultra-flexible solar cells
Source: Royal Society of Chemistry journal article supplement (doi:10.1039/c6ra08816c), 2016-01-01
Supplement: c6ra08816c1.pdf [file c6ra08816c1.pdf]

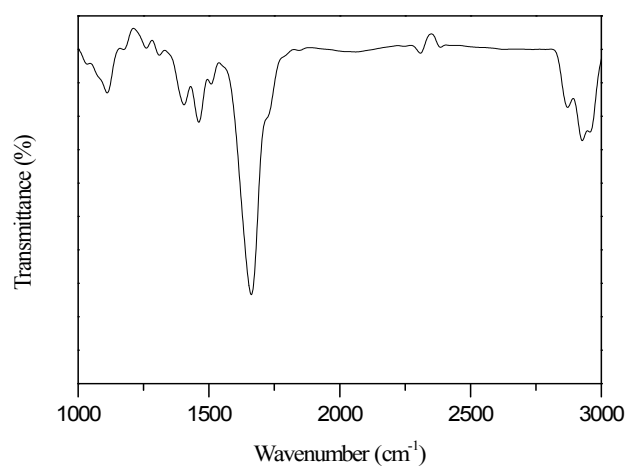

**Fig. S1.** FTIR spectrum of perovskite (6-ACA)<sub>0.038</sub>(CH<sub>3</sub>NH<sub>3</sub>)<sub>0.962</sub>PbI<sub>3</sub> crystals.

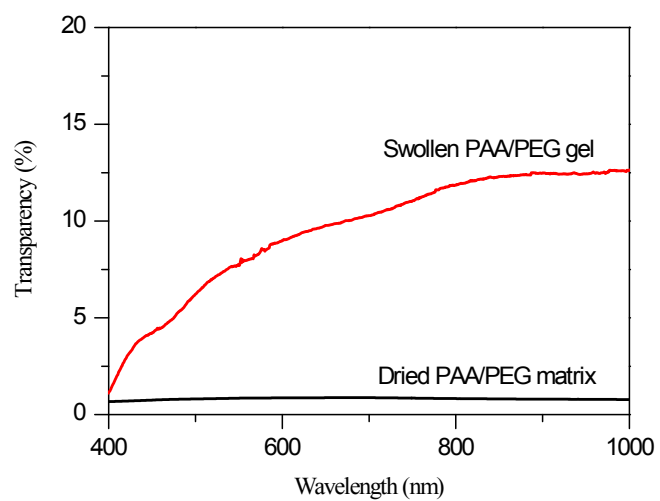

**Fig. S2.** The optical transmission spectra of dried PAA/PEG matrix and swollen PAA/PEG gel.

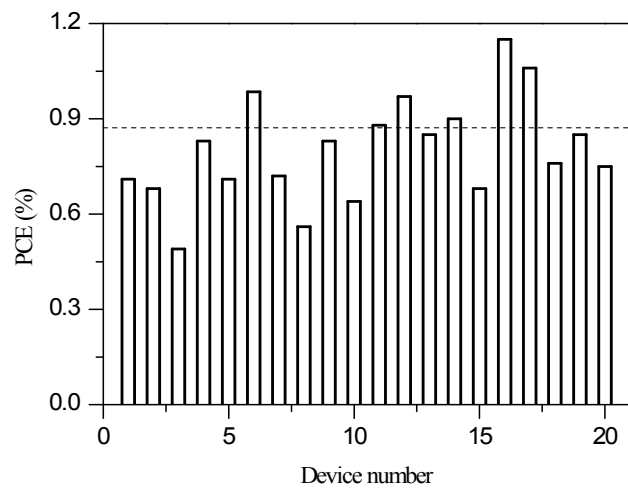

**Fig. S3.** PCE distribution of 20 randomly selected PSCs at undeformed situation. The dash line means the position of reported 0.88% efficiency.

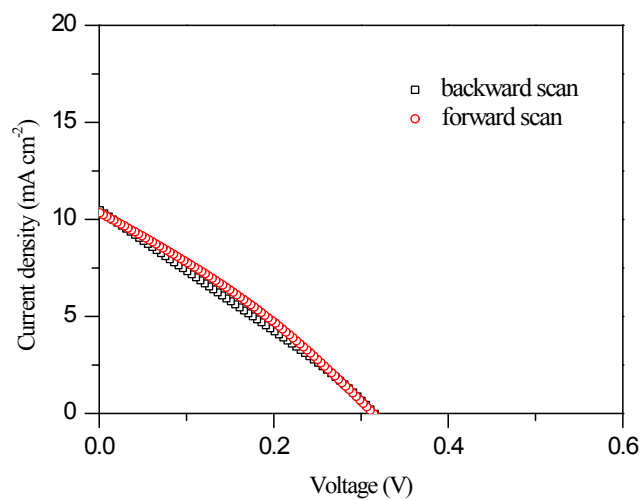

**Fig. S4.** Characteristic  $J$ - $V$  curves of the deformable PAA-PEG/Ti/PANi:(6-ACA)<sub>0.038</sub>(CH<sub>3</sub>NH<sub>3</sub>)<sub>0.962</sub>PbI<sub>3</sub>/(6-ACA)<sub>0.038</sub>(CH<sub>3</sub>NH<sub>3</sub>)<sub>0.962</sub>PbI<sub>3</sub>/PCBM:(6-ACA)<sub>0.038</sub>(CH<sub>3</sub>NH<sub>3</sub>)<sub>0.962</sub>PbI<sub>3</sub>/Ti PSC at forward and backward scanning directions. Backward scan: from +1 to 0 V; Forward scan: from 0 to + 1 V. The scanning rate was 100 mV s<sup>-1</sup>.

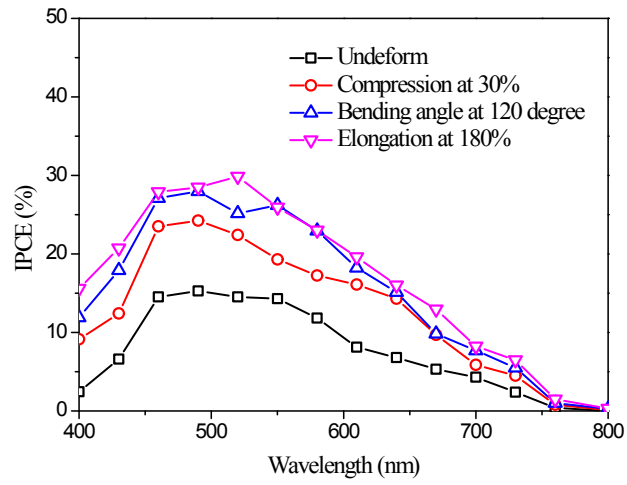

**Fig. S5.** IPCE spectra of the PSC devices measured at various states.
